# Supplementary material
Source: ML conference proceedings conference paper supplement (https://openreview.net/forum?id=H3GgpSIiqxq)

swapping error

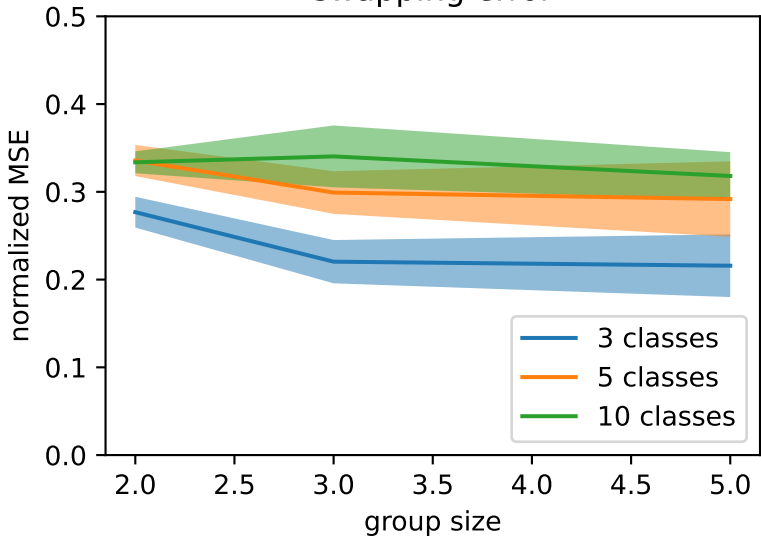

Supplement: supplementary_material [file attachment]

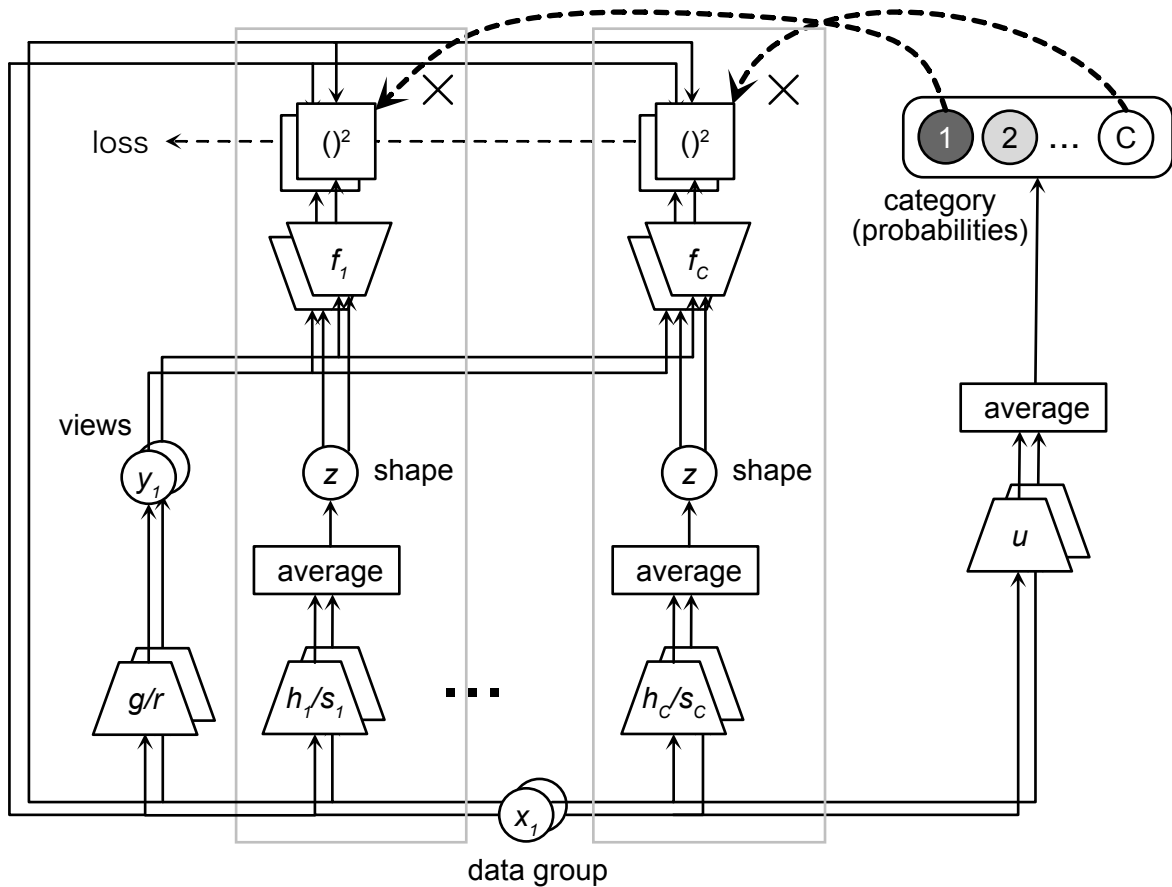

Supplement: supplementary_material [file attachment]

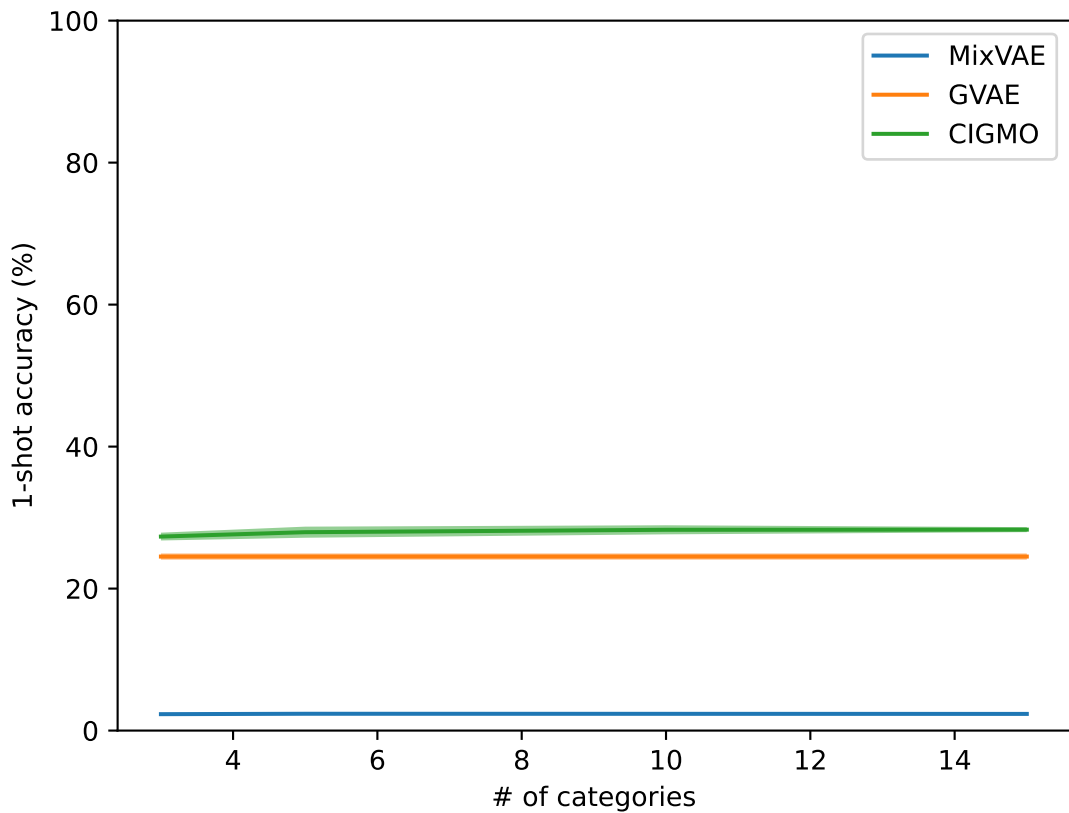

Supplement: supplementary_material [file attachment]

(A)  
Invariant  
clustering

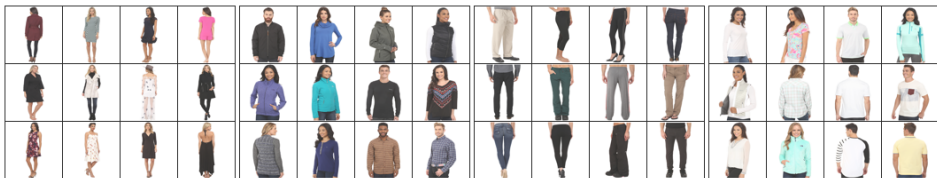

*view*

(B)

Swapping  
*shape*

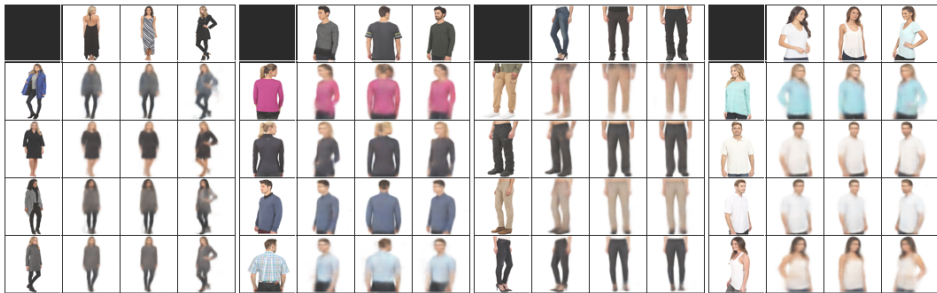

category 1

category 2

category 3

category 4

Supplement: supplementary_material [file attachment]

shape->id accuracy

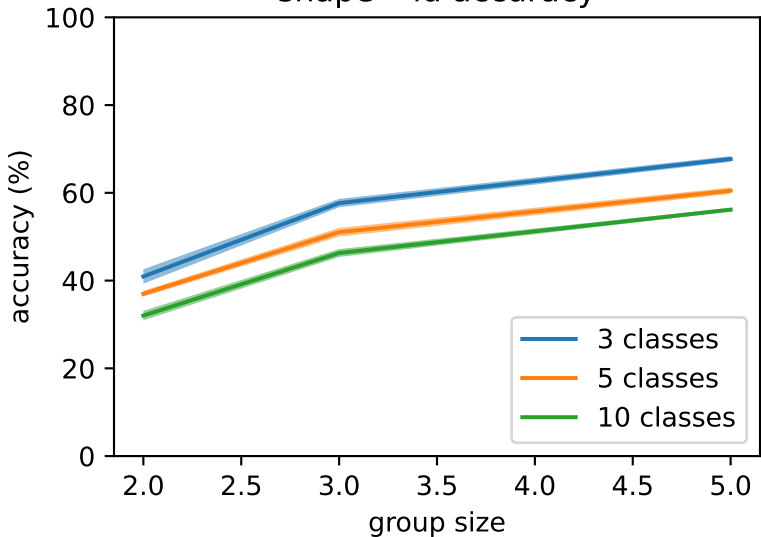

Supplement: supplementary_material [file attachment]

10 classes

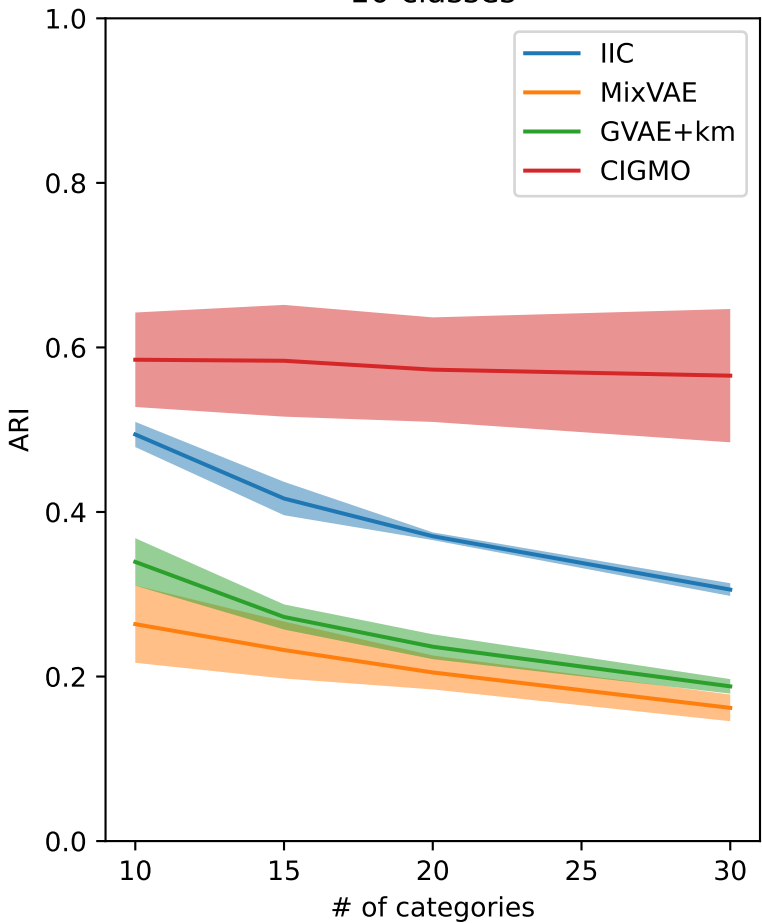

Supplement: supplementary_material [file attachment]

3 classes

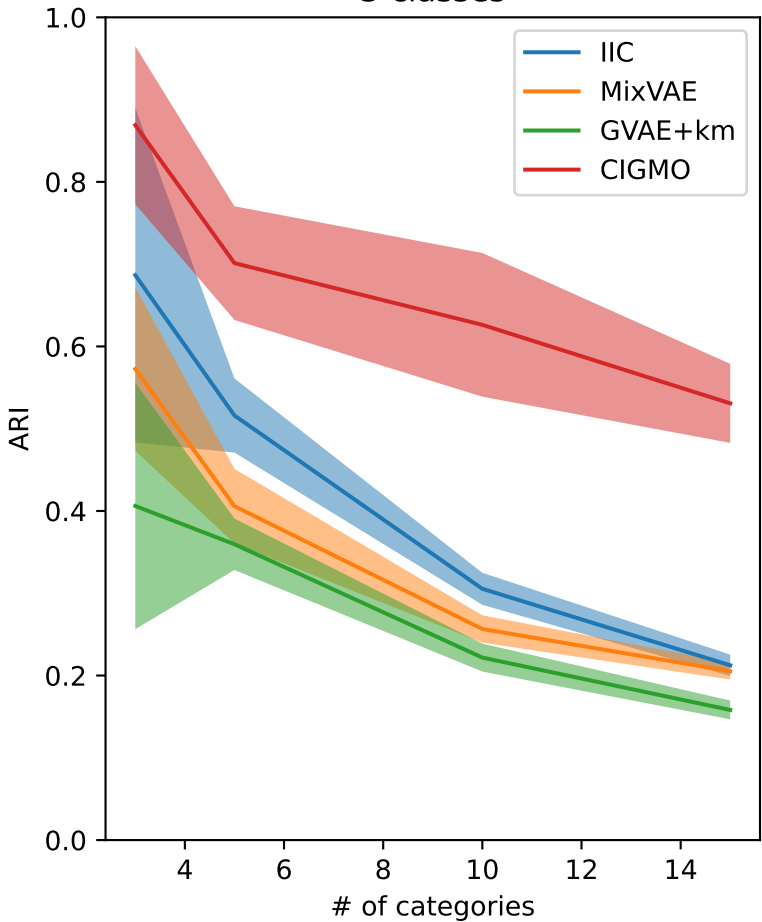

Supplement: supplementary_material [file attachment]

car category

chair category

view variation

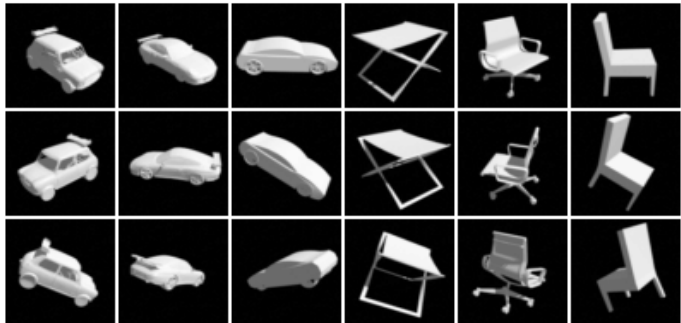

shape variation

Supplement: supplementary_material [file attachment]

one-shot identification

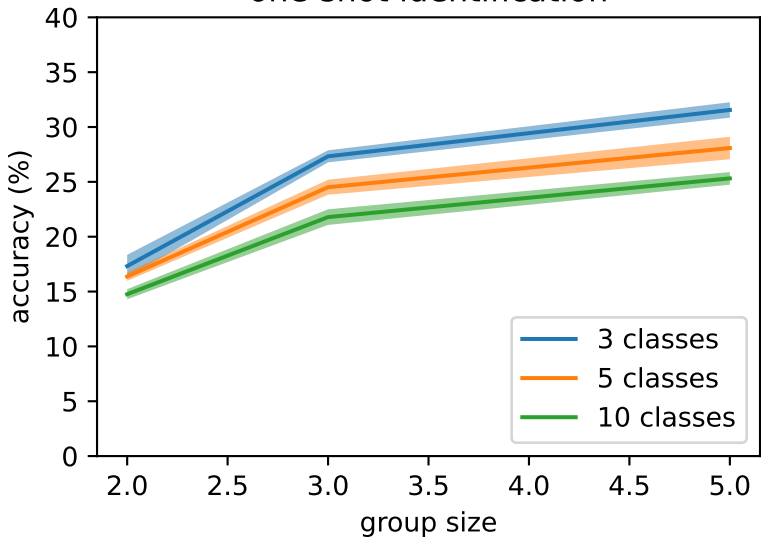

Supplement: supplementary_material [file attachment]

10 classes

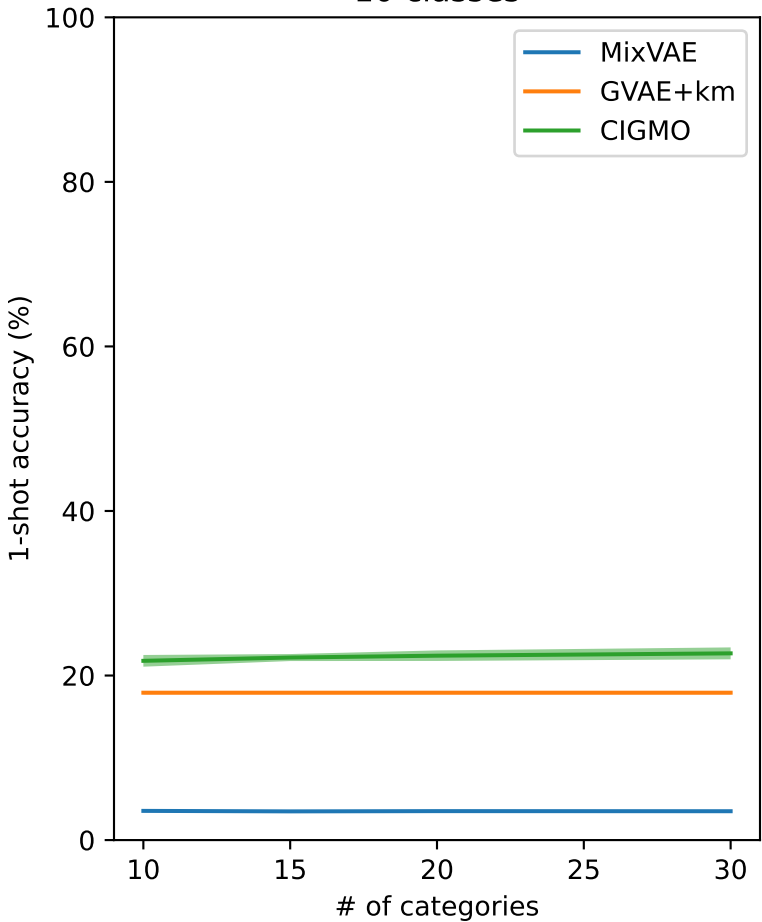

Supplement: supplementary_material [file attachment]

# invariant clustering

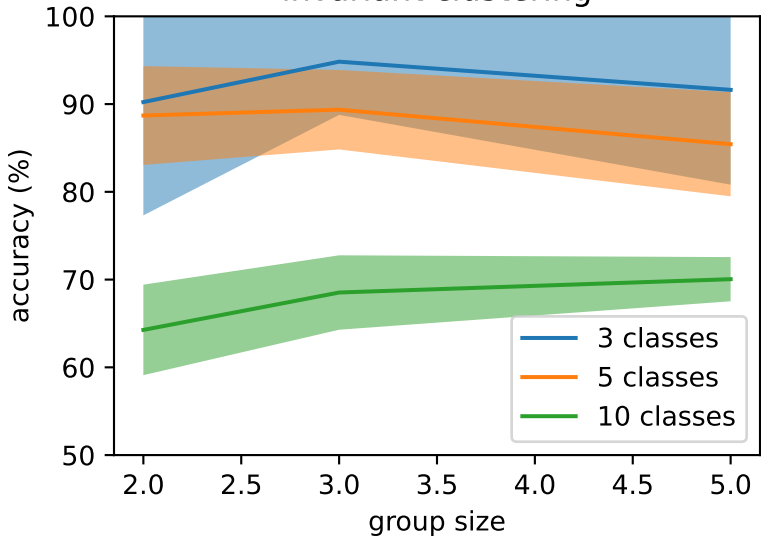

Supplement: supplementary_material [file attachment]

3 classes

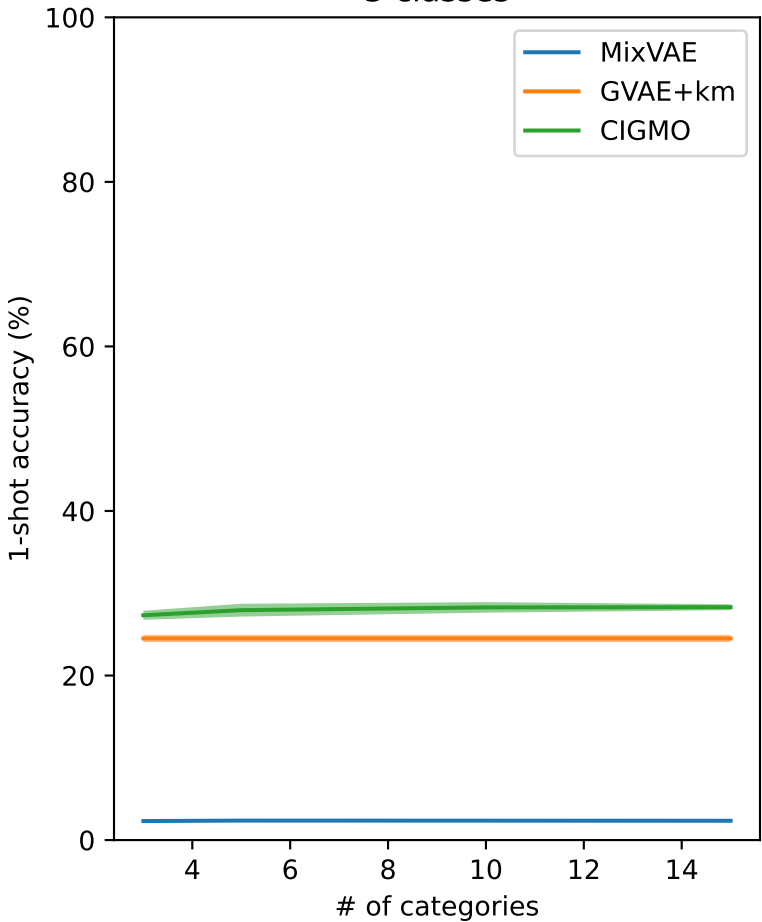

Supplement: supplementary_material [file attachment]

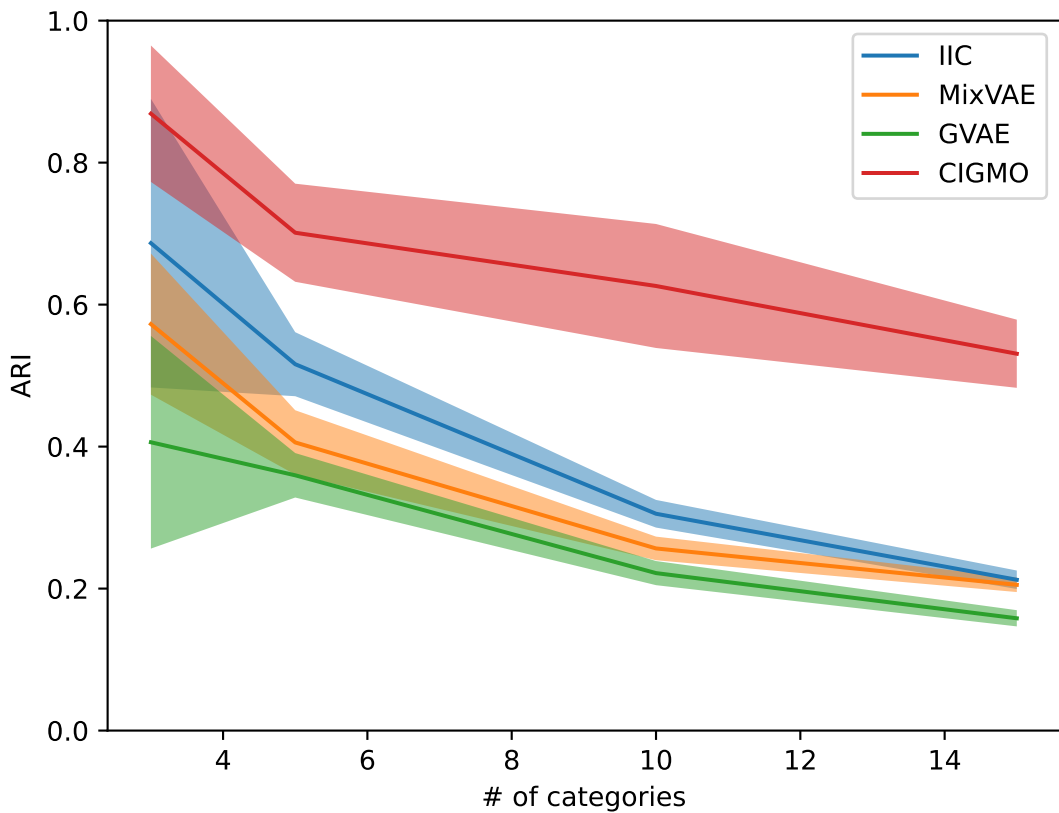

Supplement: supplementary_material [file attachment]

(A)

CIGMO

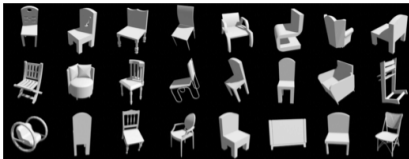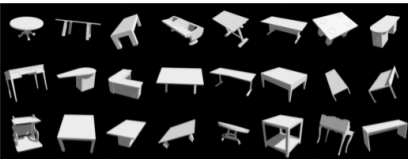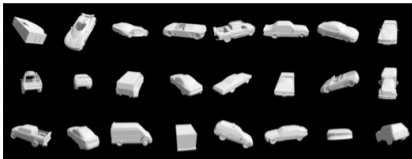

(B)

GVAE  
+  $k$ -means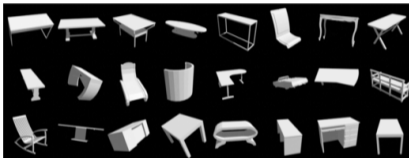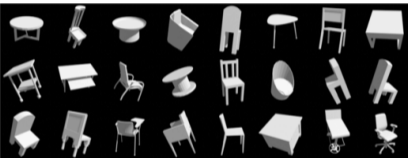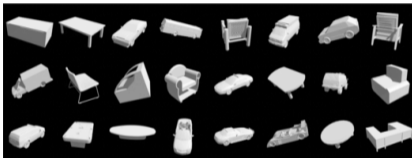

(C)

IIC

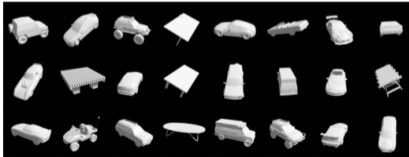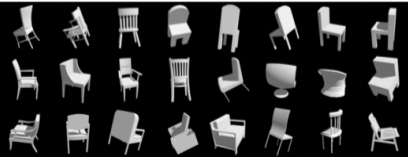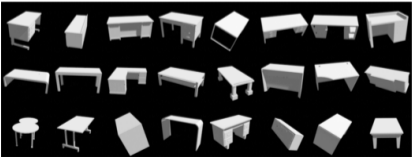

category 1

category 2

category 3

Supplement: supplementary_material [file attachment]

(A)

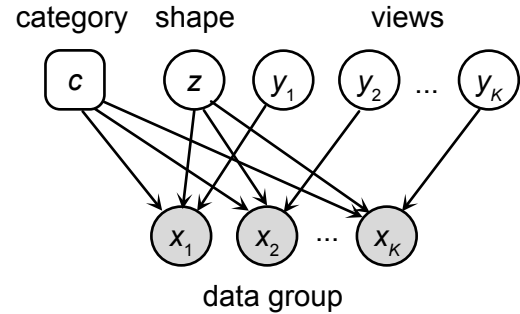

(B)

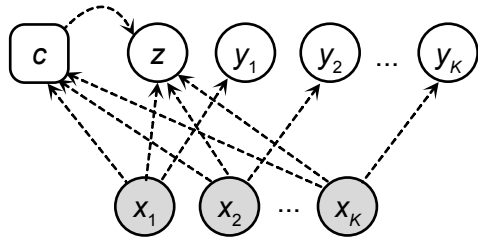

Supplement: supplementary_material [file attachment]
